# Supplementary material
Source: MDPI journal article supplement (https://www.mdpi.com/2079-9284/8/3/63)
Supplement: s1 [file s1]

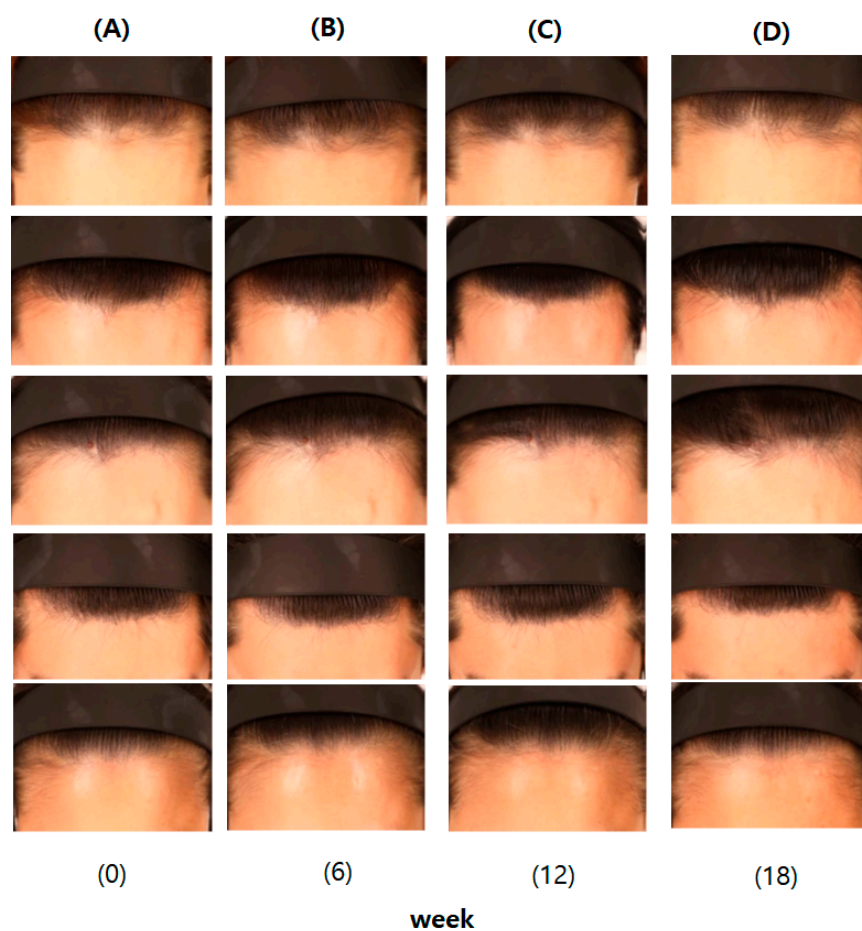

**Figure S1.** Five representative images for forehead line obtained from using a high-resolution digital camera after 6, 12, and 18 weeks of use compared to before using the test products. Images are from (A) before using the products or after (B) 6 weeks, (C) 12 weeks, and (D) 18 weeks of using the test products (No. 9, 10, 11, 12, and 21).

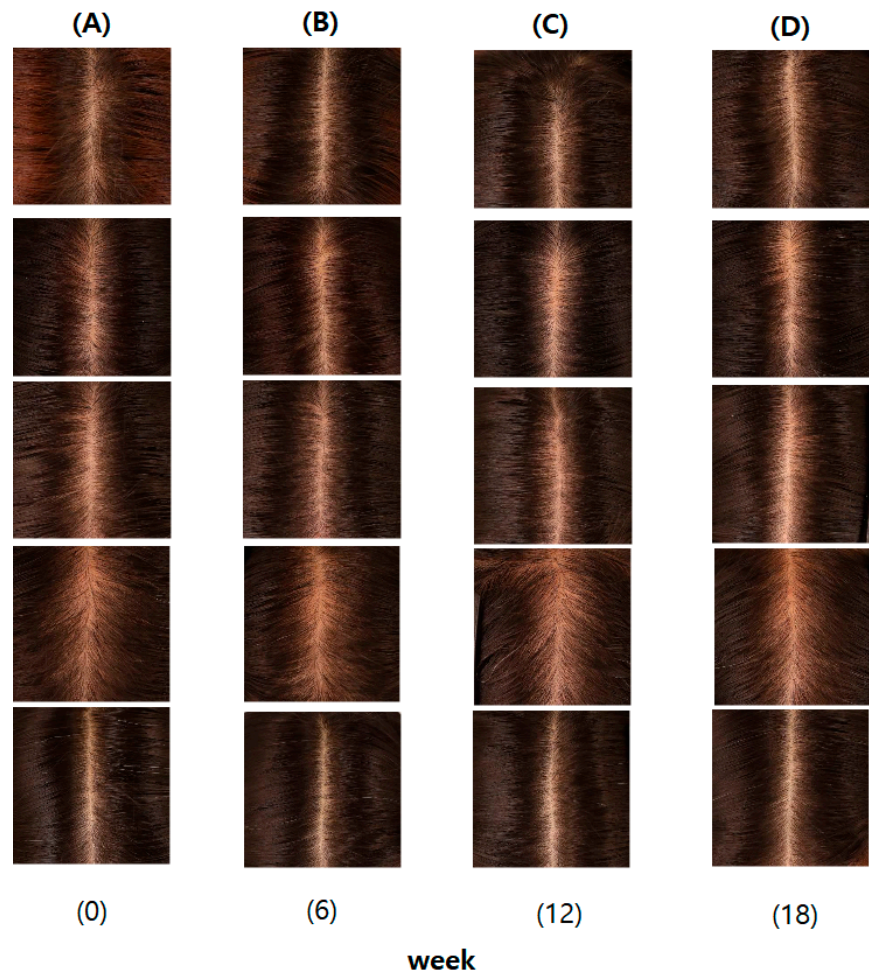

**Figure S2.** Five representative images for crown of the head obtained from using a high-resolution digital camera after 6, 12, and 18 weeks of use compared to before using the test products. Images are from (A) before using the products or after (B) 6 weeks, (C) 12 weeks, and (D) 18 weeks of using the test products (No. 9, 10, 11, 12, and 21).
